# Supplementary material for: BAG-DSM: A Method for Generating Alternatives for Hierarchical Multi-Attribute Decision Models Using Bayesian Optimization
Source: MDPI journal article supplement (doi:10.3390/a15060197), 2022-06-07
Supplement: s1 [file s1]

Archive with 1 entries (1 files):
- algorithms-1736734-supplementary.pdf
